# Supplementary material for: Cardiometabolic conditions in people with autism spectrum disorder: a nationwide prospective cohort study from the Netherlands
Source: Research Square preprint supplement (doi:10.21203/rs.3.rs-4455836/v1), 2025-08-20
Supplement: Supplementary file 1 [file f58b466e4baaf3bd39ec18a8.docx]

Supplement figures

eFigure 1. Cumulative incidence of any cardiometabolic condition in individuals with and without ASD accounting for death as a competing risk

eFigure 2. Baseline age-specific hazard ratios (HRs) with 95% confidence intervals (CIs) of developing cardiometabolic conditions among individuals with ASD, compared to those without ASD

eFigure 3. Sex-specific hazard ratios (HRs) with 95% confidence intervals (CIs) of developing cardiometabolic conditions among individuals with ASD, compared to those without ASD

eFigure 4. Study design and accessible data used in the study

Supplement tables

eTable 1. Cumulative incidence of cardiometabolic conditions and death till the end of follow-up in ASD and non-ASD groups, accounting for death as a competing risk

eTable 2. Hazard ratios (HR) with 95% confidence intervals (CI) of developing cardiometabolic conditions in people with ASD, compared to those without ASD in Model 3

eTable 3. Hazard ratios (HR) with 95% confidence intervals (CI) of developing cardiometabolic conditions in people with ASD, compared to those without ASD using ASD as a time-independent predictor

eFigure 1. Cumulative incidence of any cardiometabolic condition in individuals with and without ASD accounting for death as a competing risk
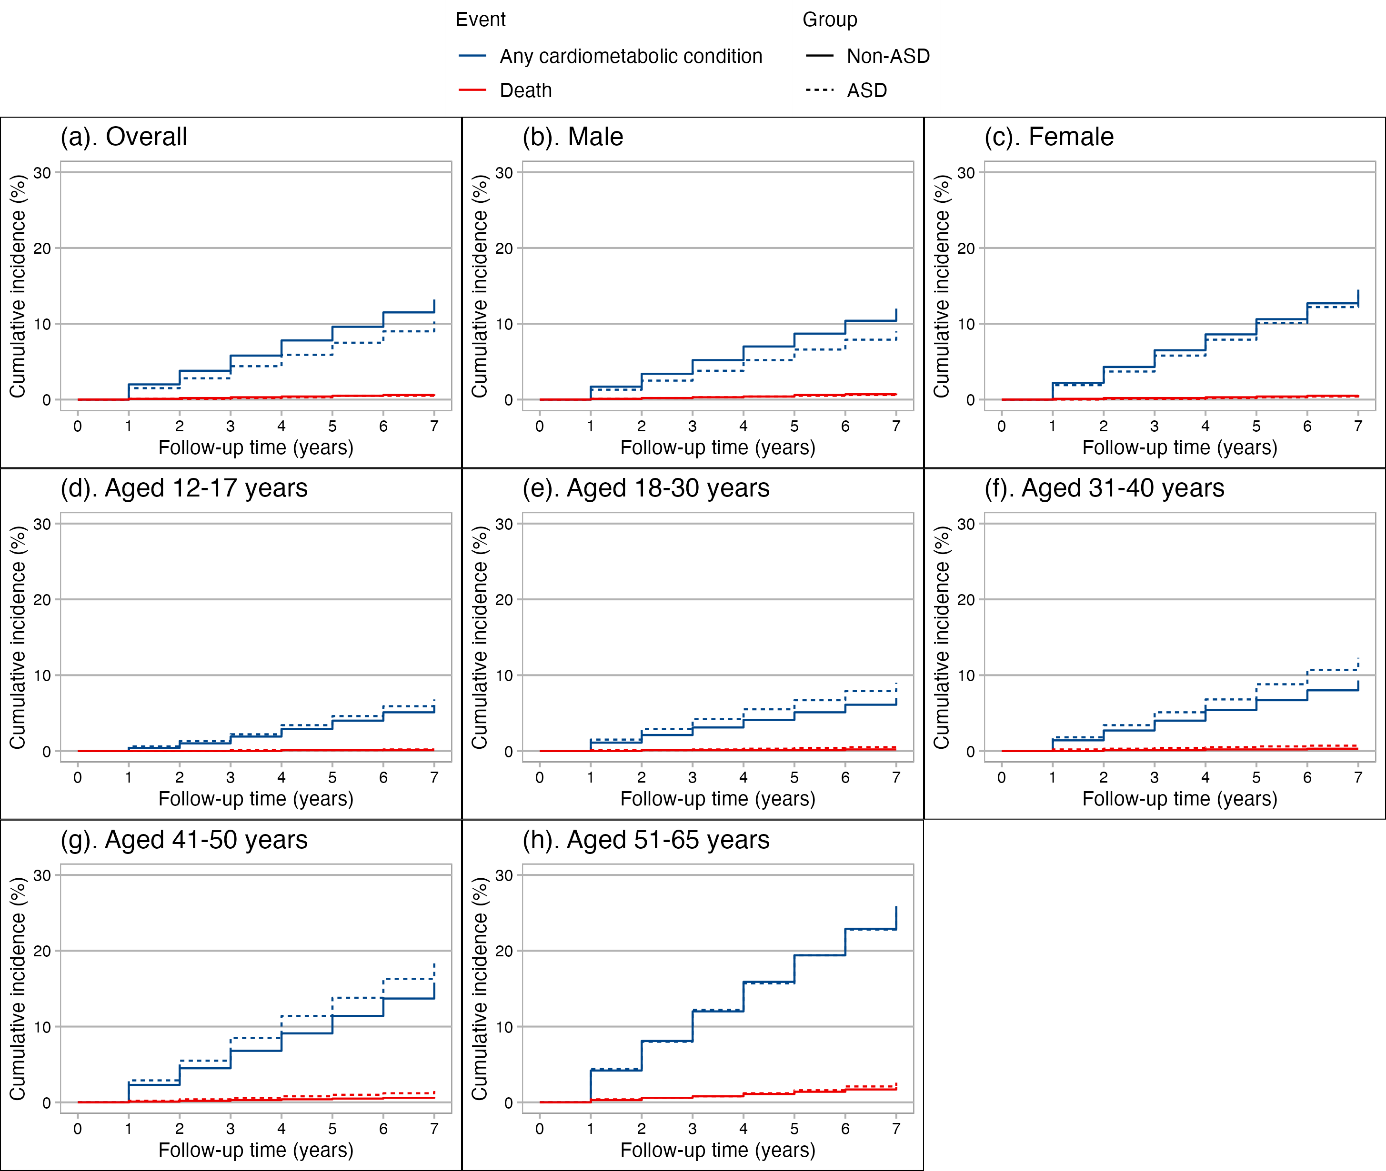


Abbreviations:ASD, autism spectrum disorder.

eFigure 2. Baseline age-specific hazard ratios (HRs) with 95% confidence intervals (CIs) of developing cardiometabolic conditions among individuals with ASD, compared to those without ASD
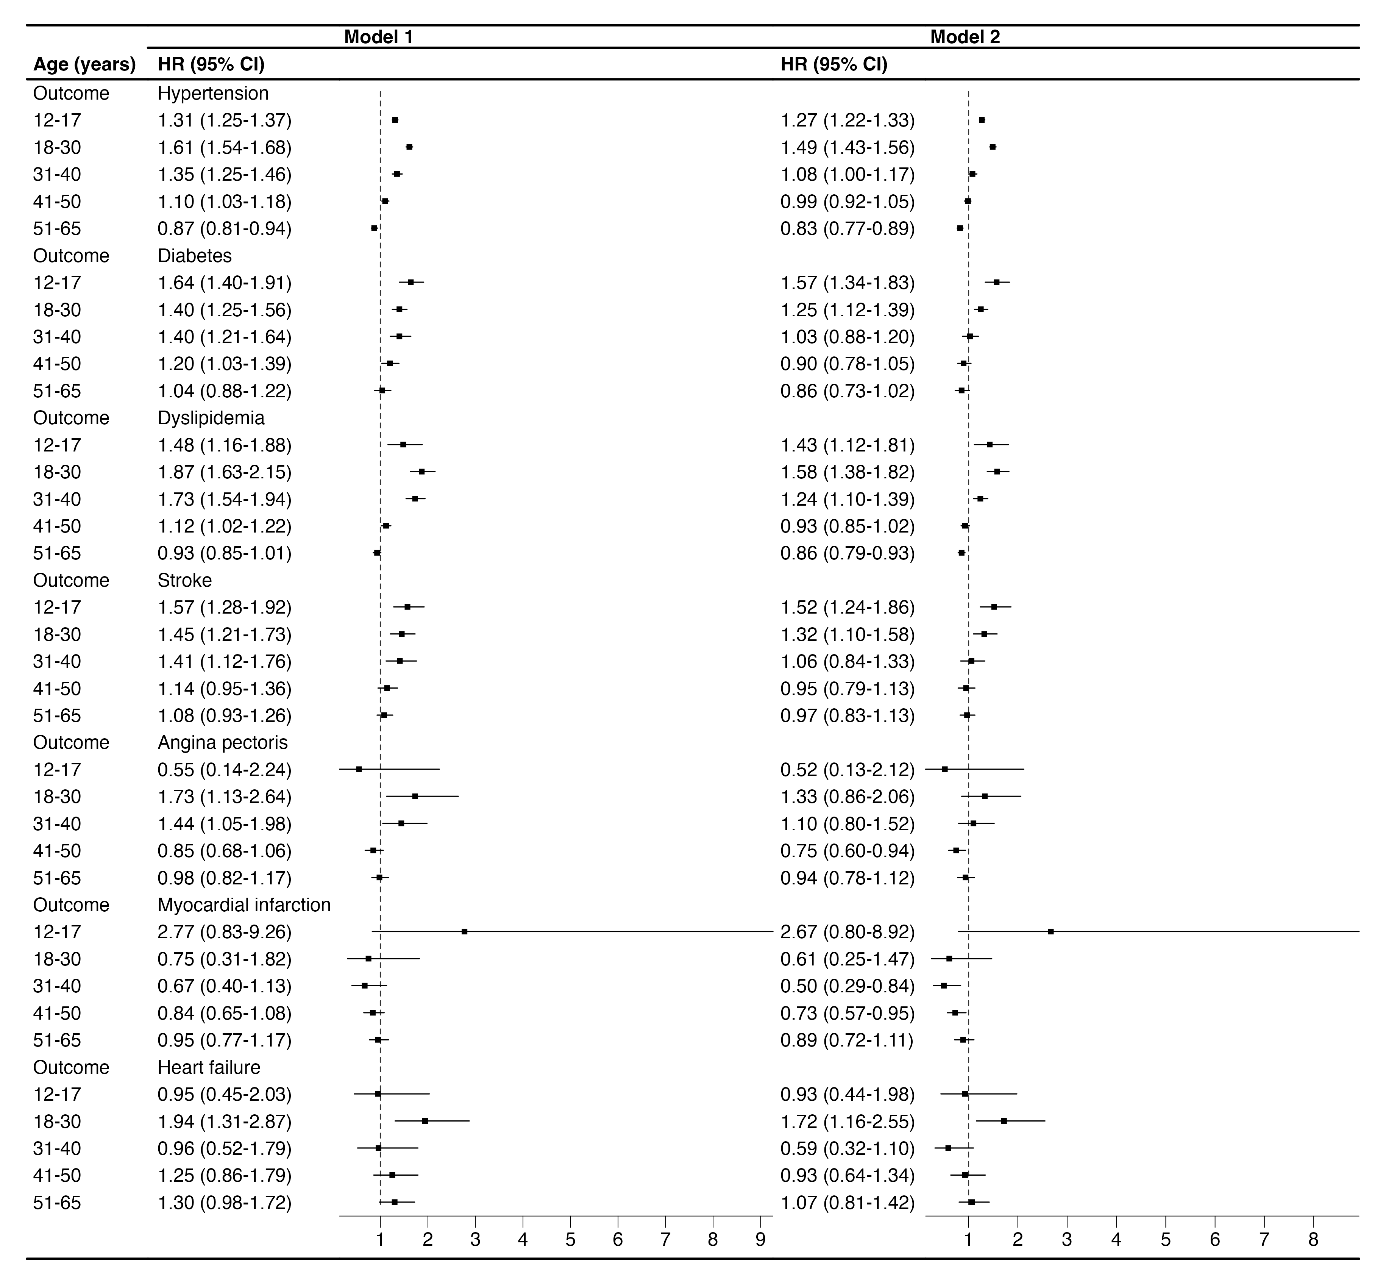


Abbreviations:HR, hazard ratio; CI, confidence interval; ASD, autism spectrum disorder.

Model 1 was adjusted for birth year and sex.

Model 2 was further adjusted for socioeconomic classification and income.

eFigure 3. Sex-specific hazard ratios (HRs) with 95% confidence intervals (CIs) of developing cardiometabolic conditions among individuals with ASD, compared to those without ASD


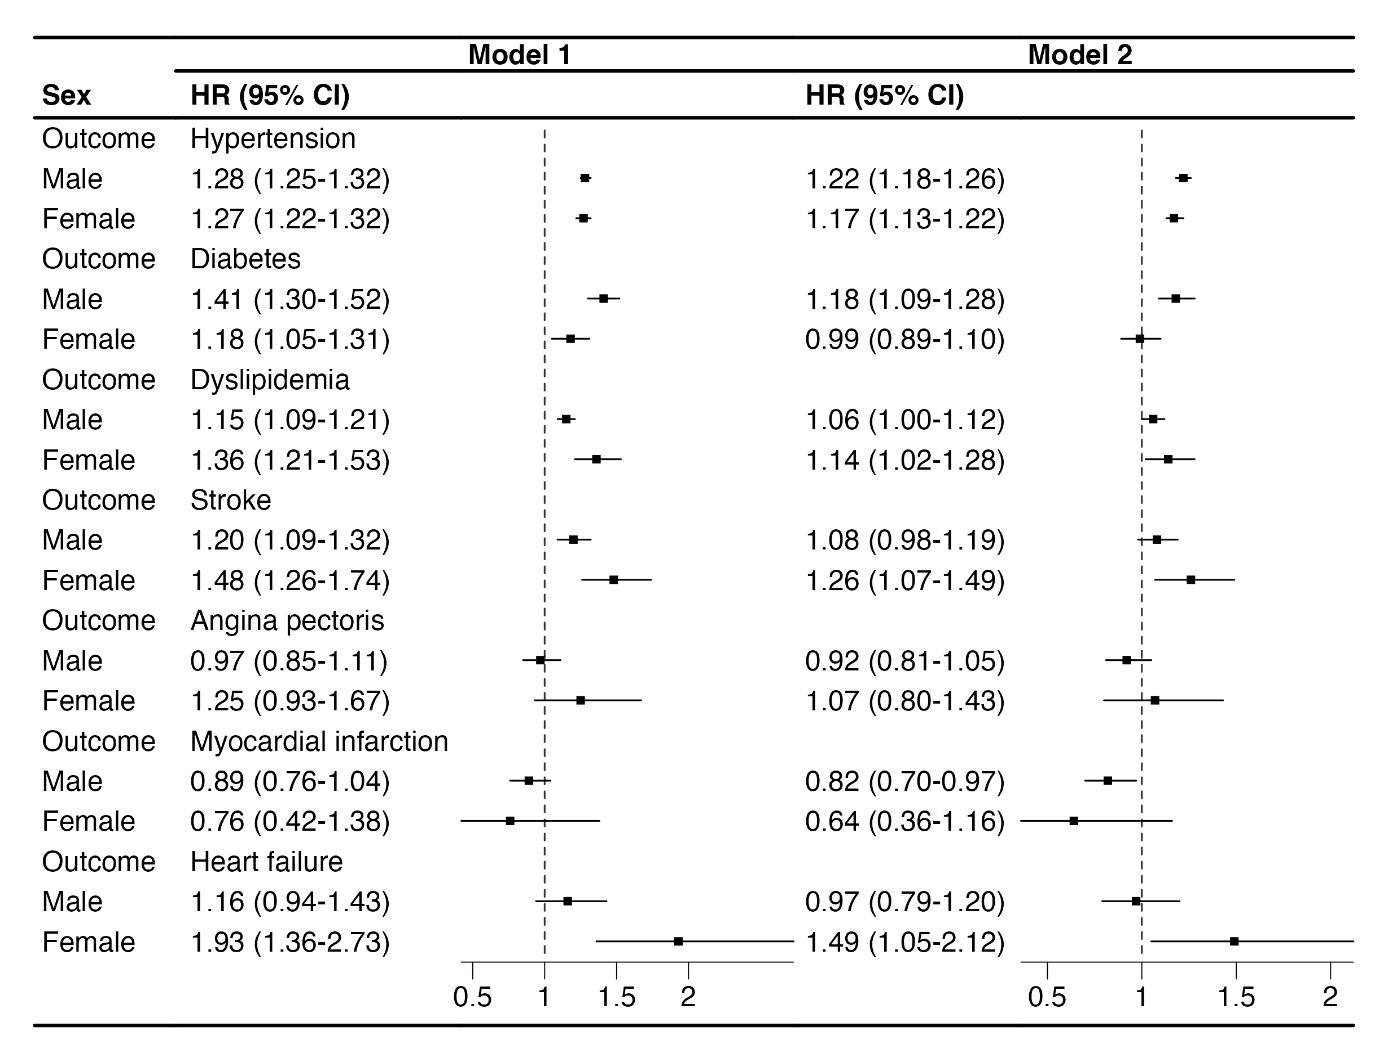


Abbreviations: HR, hazard ratio; CI, confidence interval; ASD, autism spectrum disorder.

Model 1 was adjusted for birth year and sex.

Model 2 was further adjusted for socioeconomic classification and income.

eFigure 4. Study design and accessible data used in the study


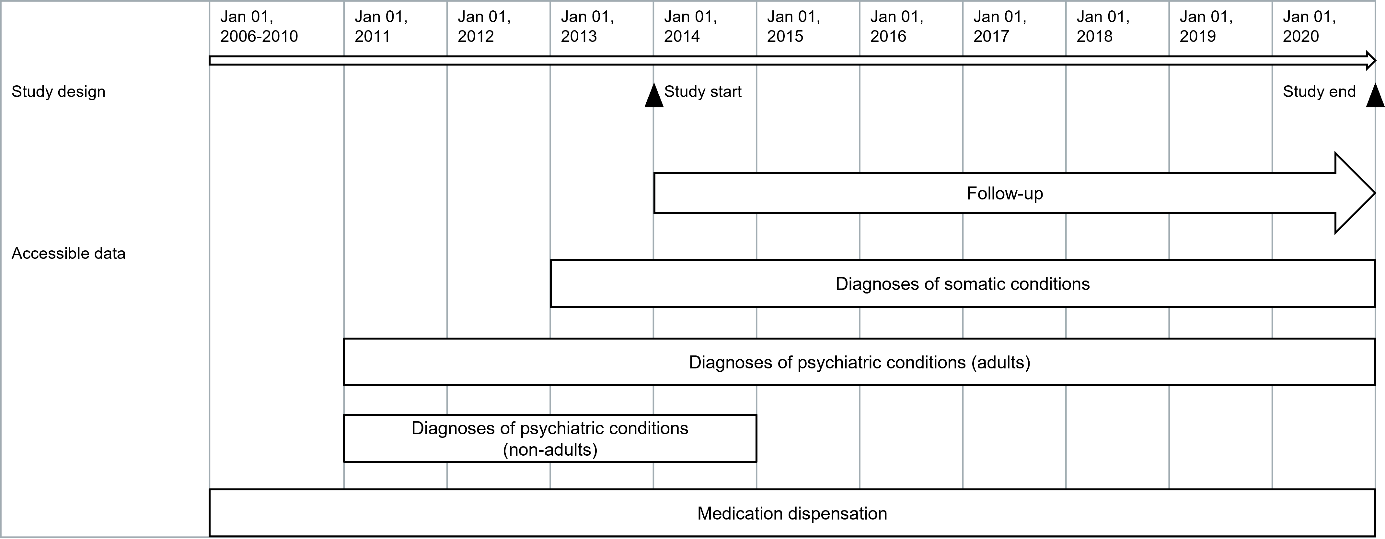


eTable 1. Cumulative incidence of cardiometabolic conditions and death till the end of follow-up in ASD and non-ASD groups, accounting for death as a competing risk

|  | **Cardiometabolic conditions,**  **incidence (95% CI)** | | **Death,**  **incidence (95% CI)** | |
| --- | --- | --- | --- | --- |
|  | **Non-ASD** | **ASD** | **Non-ASD** | **ASD** |
| Overall | 13.2 (13.2-13.3) | 10.3 (10.1-10.5) | 0.7 (0.7-0.7) | 0.7 (0.6-0.7) |
| **Sex** |  |  |  |  |
| Male | 12.0 (12.0-12.0) | 9.0 (8.8-9.2) | 0.8 (0.8-0.8) | 0.7 (0.7-0.8) |
| Female | 14.5 (14.5-14.6) | 14.0 (13.6-14.4) | 0.6 (0.6-0.6) | 0.5 (0.4-0.6) |
| **Age at baseline (years)** | |  |  |  |
| 12-17 | 6.0 (5.9-6.0) | 6.8 (6.6-7.1) | 0.1 (0.1-0.1) | 0.2 (0.2-0.3) |
| 18-30 | 7.0 (7.0-7.0) | 9.0 (8.8-9.3) | 0.2 (0.2-0.2) | 0.6 (0.5-0.7) |
| 31-40 | 9.3 (9.3-9.4) | 12.3 (11.7-12.9) | 0.3 (0.3-0.3) | 0.8 (0.6-1.0) |
| 41-50 | 15.8 (15.7-15.9) | 18.6 (17.8-19.3) | 0.7 (0.7-0.7) | 1.5 (1.2-1.7) |
| 51-65 | 25.9 (25.9-26.0) | 25.7 (24.6-26.8) | 2.0 (2.0-2.1) | 2.6 (2.2-3.0) |

Abbreviations: ASD, autism spectrum disorder; CI, confidence interval.

eTable 2. Hazard ratios (HR) with 95% confidence intervals (CI) of developing cardiometabolic conditions in people with ASD, compared to those without ASD in Model 3

|  | **Model 3a** |  | **Model 3b** |  | **Model 3c** |  | **Model 3d** |  |
| --- | --- | --- | --- | --- | --- | --- | --- | --- |
| **Outcomes** | **HR (95% CI)** | ***p* value** | **HR (95% CI)** | ***p* value** | **HR (95% CI)** | ***p* value** | **HR (95% CI)** | ***p* value** |
| Any cardiometabolic condition | 1.07 (1.04-1.09) | <.001 | 1.07 (1.05-1.09) | <.001 | 1.08 (1.05-1.10) | <.001 | 1.08 (1.05-1.10) | <.001 |
| Hypertension | 1.05 (1.02-1.08) | <.001 | 1.05 (1.02-1.08) | <.001 | 1.06 (1.03-1.08) | <.001 | 1.06 (1.03-1.08) | <.001 |
| Diabetes | 0.98 (0.92-1.04) | 0.610 | 0.99 (0.93-1.05) | 0.781 | 0.99 (0.93-1.06) | 0.937 | 1.01 (0.95-1.08) | 0.625 |
| Dyslipidemia | 0.99 (0.94-1.04) | 0.849 | 1.01 (0.97-1.07) | 0.460 | 1.00 (0.95-1.05) | 0.771 | 1.03 (0.98-1.08) | 0.216 |
| Stroke | 1.05 (0.97-1.14) | 0.197 | 1.06 (0.98-1.15) | 0.132 | 1.05 (0.97-1.14) | 0.189 | 1.05 (0.97-1.14) | 0.186 |
| Angina pectoris | 0.87 (0.77-0.98) | 0.030 | 0.90 (0.79-1.01) | 0.094 | 0.89 (0.79-1.01) | 0.068 | 0.91 (0.81-1.03) | 0.155 |
| Myocardial infarction | 0.78 (0.67-0.91) | 0.002 | 0.79 (0.68-0.92) | 0.004 | 0.79 (0.68-0.92) | 0.003 | 0.79 (0.68-0.92) | 0.004 |
| Heart failure | 1.02 (0.85-1.22) | 0.828 | 1.02 (0.85-1.23) | 0.769 | 1.01 (0.84-1.21) | 0.899 | 1.02 (0.85-1.22) | 0.828 |

(Continued)

|  | **Model 3e** |  | **Model 3f** |  | **Model 3g** |  | **Model 3h** |  | **Model 3i** |  |
| --- | --- | --- | --- | --- | --- | --- | --- | --- | --- | --- |
| **Outcomes** | **HR (95% CI)** | ***p* value** | **HR (95% CI)** | ***p* value** | **HR (95% CI)** | ***p* value** | **HR (95% CI)** | ***p* value** | **HR (95% CI)** | ***p* value** |
| Any cardiometabolic condition | 1.09 (1.06-1.11) | <.001 | 1.10 (1.07-1.12) | <.001 | 1.10 (1.08-1.12) | <.001 | 1.10 (1.07-1.12) | <.001 | 1.09 (1.07-1.12) | <.001 |
| Hypertension | 1.07 (1.04-1.10) | <.001 | 1.08 (1.06-1.11) | <.001 | 1.08 (1.05-1.11) | <.001 | 1.08 (1.05-1.11) | <.001 | 1.08 (1.05-1.11) | <.001 |
| Diabetes | 1.01 (0.94-1.07) | 0.765 | 0.97 (0.91-1.04) | 0.448 | 1.00 (0.94-1.07) | 0.845 | 1.00 (0.93-1.06) | 0.987 | 0.98 (0.92-1.04) | 0.546 |
| Dyslipidemia | 1.03 (0.97-1.07) | 0.323 | 1.02 (0.97-1.07) | 0.296 | 1.04 (0.99-1.09) | 0.116 | 1.04 (0.99-1.09) | 0.100 | 1.03 (0.98-1.08) | 0.195 |
| Stroke | 1.06 (0.97-1.15) | 0.155 | 1.08 (1.01-1.18) | 0.041 | 1.08 (0.99-1.17) | 0.054 | 1.08 (1.00-1.17) | 0.050 | 1.07 (0.98-1.16) | 0.102 |
| Angina pectoris | 0.91 (0.81-1.03) | 0.162 | 0.94 (0.83-1.06) | 0.320 | 0.92 (0.82-1.04) | 0.226 | 0.92 (0.81-1.04) | 0.204 | 0.91 (0.81-1.03) | 0.176 |
| Myocardial infarction | 0.79 (0.67-0.92) | 0.003 | 0.80 (0.69-0.94) | 0.007 | 0.80 (0.68-0.93) | 0.005 | 0.79 (0.68-0.93) | 0.004 | 0.80 (0.68-0.93) | 0.005 |
| Heart failure | 1.00 (0.83-1.19) | 0.982 | 1.01 (0.85-1.21) | 0.855 | 1.03 (0.86-1.24) | 0.698 | 1.03 (0.86-1.23) | 0.720 | 1.00 (0.84-1.20) | 0.919 |

Abbreviations: HR, hazard ratio; CI, confidence interval; ASD, autism spectrum disorder.

Models 3a-3i were adjusted for birth year, sex, socioeconomic classification, income, and each psychiatric comorbidity in each model.

Specifically, Model 3a: depressive disorders; Model 3b: anxiety disorders; Model 3c: personality disorders; Model 3d: ADHD; Model 3e: substance use disorders; Model 3f: schizophrenia; Model 3g: bipolar disorders; Model 3h: eating disorders; Model 3i: intellectual disability.

eTable 3. Hazard ratios (HR) with 95% confidence intervals (CI) of developing cardiometabolic conditions in people with ASD, compared to those without ASD using ASD as a time-independent predictor

| **Outcomes** | **Model 1** |  | **Model 2** |  |
| --- | --- | --- | --- | --- |
|  | **HR (95% CI)** | ***p* value** | **HR (95% CI)** | ***p* value** |
| Any cardiometabolic condition | 1.28 (1.25-1.30) | <.001 | 1.18 (1.16-1.21) | <.001 |
| Hypertension | 1.23 (1.16-1.30) | <.001 | 1.03 (0.97-1.09) | 0.315 |
| Dyslipidemia | 1.26 (1.23-1.28) | <.001 | 1.18 (1.16-1.21) | <.001 |
| Diabetes | 1.20 (1.15-1.25) | <.001 | 1.08 (1.03-1.12) | <.001 |
| Stroke | 1.24 (1.16-1.34) | <.001 | 1.10 (1.02-1.19) | 0.007 |
| Angina pectoris | 1.00 (0.89-1.12) | 0.979 | 0.92 (0.83-1.04) | 0.186 |
| Myocardial infarction | 0.90 (0.78-1.03) | 0.108 | 0.82 (0.72-0.94) | 0.005 |
| Heart failure | 1.32 (1.13-1.55) | 0.001 | 1.09 (0.93-1.28) | 0.278 |

Abbreviations: HR, hazard ratio; CI, confidence interval; ASD, autism spectrum disorder.

Model 1 was adjusted for birth year and sex;

Model 2 was adjusted for birth year, sex, socioeconomic classification, and income.
